# Supplementary figures and images for: Gene Expression Signature Differentiates Histology But Not Progression Status of Early-Stage NSCLC
Source: PubMed Central journal article supplement — Transl Oncol. 2017 Apr 26;10(3):450–8. doi: 10.1016/j.tranon.2017.01.015 (PMC5408153; doi:10.1016/j.tranon.2017.01.015), 2017-04-26

Pearson's correlation coefficient = 0.746

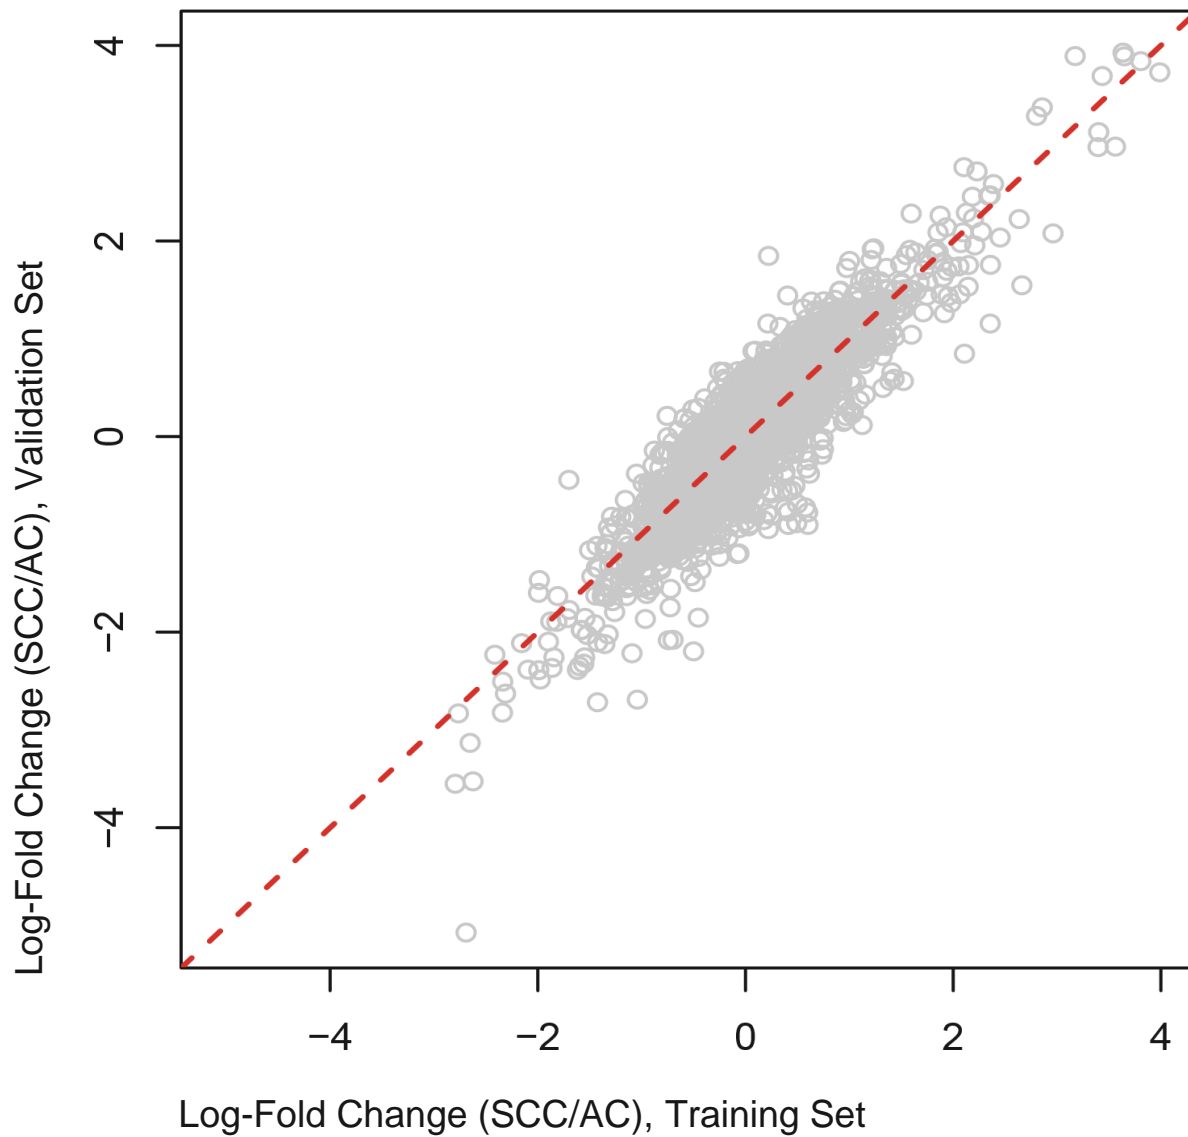

Supplement: mmc1.pdf [file mmc1.pdf]
